# Supplementary material for: Intra-Genomic Ribosomal RNA Polymorphism and Morphological Variation in Elphidium macellum Suggests Inter-Specific Hybridization in Foraminifera
Source: PubMed Central journal article supplement (PMC3290570; doi:10.1371/journal.pone.0032373), 2012-02-29
Supplement: pone.0032373.s006.pdf [file pone.0032373.s006.pdf]

**Table S1.** Ribotype occurrence among the analyzed specimens for loci 37/f, 41/f and 47/f.

| DNA number   | Number of clones | Number of ribotypes | 37/f      |           |           | 41/f      |           | 47/f      |           |
|--------------|------------------|---------------------|-----------|-----------|-----------|-----------|-----------|-----------|-----------|
|              |                  |                     | a         | b         | c         | a         | b         | a         | b         |
| 14.662       | 2                | 2                   | 1         | 1         |           | 2         |           | 1         | 1         |
| 18.666       | 2                | 2                   | 1         | 1         |           | 1         | 1         | 1         | 1         |
| 2.649        | 2                | 1                   |           |           | 2         | 2         |           | 2         |           |
| 4.651        | 2                | 2                   | 1         | 1         |           | 2         |           | 2         |           |
| 5.652        | 1                | 1                   |           |           | 1         | 1         |           | 1         |           |
| 7.654        | 2                | 2                   |           |           | 2         | 2         |           | 1         | 1         |
| B6228        | 4                | 4                   | 2         | 1         | 1         | 2         | 2         | 2         | 2         |
| B6232        | 1                | 1                   |           |           | 1         | 1         |           | 1         |           |
| B6236        | 2                | 2                   | 1         |           | 1         | 1         | 1         | 1         | 1         |
| C5865        | 5                | 1                   |           |           | 5         | 5         |           | 5         |           |
| C5867        | 2                | 2                   | 1         |           | 1         | 2         |           | 2         |           |
| G5861        | 3                | 2                   |           |           | 3         | 2         | 1         | 3         |           |
| G5862        | 3                | 3                   | 2         |           | 1         | 2         | 1         | 2         | 1         |
| G5863        | 3                | 2                   | 1         |           | 2         | 3         |           | 3         |           |
| L5749        | 1                | 1                   |           |           | 1         | 1         |           | 1         |           |
| L5750        | 6                | 3                   | 1         |           | 5         | 6         |           | 4         | 2         |
| L5752        | 2                | 2                   | 1         | 1         |           | 2         |           | 2         |           |
| L5808        | 2                | 2                   | 1         |           | 1         | 2         |           | 1         | 1         |
| L5809        | 2                | 2                   | 1         |           | 1         | 2         |           | 2         |           |
| L5812        | 7                | 5                   | 1         | 3         | 3         | 6         | 1         | 2         | 5         |
| Ot6026       | 1                | 1                   |           | 1         |           | 1         |           | 1         |           |
| Ot6172       | 6                | 4                   | 4         | 2         |           | 2         | 4         | 3         | 3         |
| Ot6174       | 1                | 1                   |           |           | 1         | 1         |           | 1         |           |
| U6435        | 5                | 4                   | 3         | 2         |           | 3         | 2         | 5         |           |
| U6436        | 3                | 3                   | 2         |           | 1         | 2         | 1         | 2         | 1         |
| <b>TOTAL</b> |                  |                     | <b>24</b> | <b>13</b> | <b>33</b> | <b>56</b> | <b>14</b> | <b>51</b> | <b>19</b> |

Spearman correlation coefficient between number of clones and number of ribotypes:

$$\rho = 0.7939 \text{ with } p < 0.000001$$
