# Supplementary material for: Intra-Genomic Ribosomal RNA Polymorphism and Morphological Variation in Elphidium macellum Suggests Inter-Specific Hybridization in Foraminifera
Source: PubMed Central journal article supplement (PMC3290570; doi:10.1371/journal.pone.0032373), 2012-02-29
Supplement: pone.0032373.s007.pdf [file pone.0032373.s007.pdf]

**Table S2.** Accession numbers of DNA sequences used in this study.

| <b>Organism / Gene</b>           | <b>Morphospecies / DNA number</b>   | <b>Accession number (s)</b>  |          |
|----------------------------------|-------------------------------------|------------------------------|----------|
| Foraminifers / Complete 18S rDNA | <i>H. orbiculare</i> / C131.1       | HM213840                     |          |
|                                  | <i>H. orbiculare</i> / C131.2       | HM213841                     |          |
|                                  | <i>H. germanica</i> / 6008          | EF534074                     |          |
|                                  | <i>E. albiumbilicatum</i> / 10013.1 | HM213832                     |          |
|                                  | <i>E. albiumbilicatum</i> / 10013.2 | HM213833                     |          |
|                                  | <i>E. excavatum</i> / C62.1         | HM213829                     |          |
|                                  | <i>E. excavatum</i> / C62.2         | HM213830                     |          |
|                                  | <i>E. excavatum</i> / C62.3         | HM213831                     |          |
|                                  | <i>E. excavatum</i> / 6009          | EF534073                     |          |
|                                  | <i>E. macellum</i> / 5865.1         | JN655697                     |          |
|                                  | <i>E. macellum</i> / 5865.2         | JN655698                     |          |
|                                  | <i>E. macellum</i> / 6172.1         | JN655699                     |          |
|                                  | <i>E. macellum</i> / 6172.2         | JN655700                     |          |
|                                  | <i>E. macellum</i> / 6228.1         | JN655701                     |          |
|                                  | <i>E. macellum</i> / 6228.2         | JN655702                     |          |
|                                  | <i>E. williamsoni</i> / C6.1        | HM213839                     |          |
|                                  | <i>E. williamsoni</i> / 10017.1     | HM213827                     |          |
|                                  | <i>E. williamsoni</i> / 10017.2     | HM213828                     |          |
|                                  | <i>E. aculeatum</i> / D3.1          | HM213834                     |          |
|                                  | <i>E. aculeatum</i> / D3.2          | HM213835                     |          |
|                                  | <i>E. aculeatum</i> / D3.3          | HM213837                     |          |
|                                  | <i>E. aculeatum</i> / D18.1         | HM213838                     |          |
|                                  | <i>E. aculeatum</i> / D18.2         | HM213836                     |          |
|                                  | <i>E. aculeatum</i> / A53.1         | HM213822                     |          |
|                                  | <i>E. aculeatum</i> / A53.2         | HM213823                     |          |
|                                  | <i>E. margaritaceum</i> / A13.1     | HM213824                     |          |
|                                  | <i>E. margaritaceum</i> / A108.1    | HM213825                     |          |
|                                  | <i>E. margaritaceum</i> / A108.2    | HM213826                     |          |
|                                  | Foraminifers / Partial 18S rDNA     | <i>E. macellum</i> / 14.662A | JN655703 |
|                                  |                                     | <i>E. macellum</i> / 14.662B | JN655704 |
| <i>E. macellum</i> / 18.666A     |                                     | JN655705                     |          |
| <i>E. macellum</i> / 18.666B     |                                     | JN655706                     |          |
| <i>E. macellum</i> / 2.649A      |                                     | JN655707                     |          |
| <i>E. macellum</i> / 2.649B      |                                     | JN655708                     |          |
| <i>E. macellum</i> / 4.651A      |                                     | JN655709                     |          |
| <i>E. macellum</i> / 4.651B      |                                     | JN655710                     |          |
| <i>E. macellum</i> / 5.652       |                                     | JN655711                     |          |
| <i>E. macellum</i> / 7.654A      |                                     | JN655712                     |          |
| <i>E. macellum</i> / 7.654B      |                                     | JN655713                     |          |
| <i>E. macellum</i> / B6228A      |                                     | JN655714                     |          |
| <i>E. macellum</i> / B6228B      |                                     | JN655715                     |          |
| <i>E. macellum</i> / B6228c      |                                     | JN655716                     |          |
| <i>E. macellum</i> / B6228d      |                                     | JN655717                     |          |
| <i>E. macellum</i> / B6232A      |                                     | JN655718                     |          |
| <i>E. macellum</i> / B6236A      |                                     | JN655719                     |          |
| <i>E. macellum</i> / B6236B      |                                     | JN655720                     |          |
| <i>E. macellum</i> / C5865A      |                                     | JN655721                     |          |
| <i>E. macellum</i> / C5865B      |                                     | JN655722                     |          |
| <i>E. macellum</i> / C5865C      |                                     | JN655723                     |          |
| <i>E. macellum</i> / C5865D      |                                     | JN655724                     |          |
| <i>E. macellum</i> / C5865E      |                                     | JN655725                     |          |
| <i>E. macellum</i> / C5867A      |                                     | JN655726                     |          |
| <i>E. macellum</i> / C5867B      |                                     | JN655727                     |          |
| <i>E. macellum</i> / G5861A      |                                     | JN655728                     |          |
| <i>E. macellum</i> / G5861b      |                                     | JN655729                     |          |

|                              |          |
|------------------------------|----------|
| <i>E. macellum</i> / G5861c  | JN655730 |
| <i>E. macellum</i> / G5862A  | JN655731 |
| <i>E. macellum</i> / G5862B  | JN655732 |
| <i>E. macellum</i> / G5862C  | JN655733 |
| <i>E. macellum</i> / G5863A  | JN655734 |
| <i>E. macellum</i> / G5863B  | JN655735 |
| <i>E. macellum</i> / G5863C  | JN655736 |
| <i>E. macellum</i> / L5749   | JN655737 |
| <i>E. macellum</i> / L5750A  | JN655738 |
| <i>E. macellum</i> / L5750B  | JN655739 |
| <i>E. macellum</i> / L5750C  | JN655740 |
| <i>E. macellum</i> / L5750D  | JN655741 |
| <i>E. macellum</i> / L5750E  | JN655742 |
| <i>E. macellum</i> / L5750F  | JN655743 |
| <i>E. macellum</i> / L5752A  | JN655744 |
| <i>E. macellum</i> / L5752B  | JN655745 |
| <i>E. macellum</i> / L5808A  | JN655746 |
| <i>E. macellum</i> / L5808B  | JN655747 |
| <i>E. macellum</i> / L5809A  | JN655748 |
| <i>E. macellum</i> / L5809B  | JN655749 |
| <i>E. macellum</i> / L5812A  | JN655750 |
| <i>E. macellum</i> / L5812B  | JN655751 |
| <i>E. macellum</i> / L5812C  | JN655752 |
| <i>E. macellum</i> / L5812D  | JN655753 |
| <i>E. macellum</i> / L5812E  | JN655754 |
| <i>E. macellum</i> / L5812F  | JN655755 |
| <i>E. macellum</i> / L5812G  | JN655756 |
| <i>E. macellum</i> / Ot6026  | JN655757 |
| <i>E. macellum</i> / Ot6172A | JN655758 |
| <i>E. macellum</i> / Ot6172B | JN655759 |
| <i>E. macellum</i> / Ot6172c | JN655760 |
| <i>E. macellum</i> / Ot6172d | JN655761 |
| <i>E. macellum</i> / Ot6172e | JN655762 |
| <i>E. macellum</i> / Ot6172f | JN655763 |
| <i>E. macellum</i> / Ot6174  | JN655764 |
| <i>E. macellum</i> / U6435a  | JN655765 |
| <i>E. macellum</i> / U6435b  | JN655766 |
| <i>E. macellum</i> / U6435c  | JN655767 |
| <i>E. macellum</i> / U6435e  | JN655768 |
| <i>E. macellum</i> / U6435f  | JN655769 |
| <i>E. macellum</i> / U6436a  | JN655770 |
| <i>E. macellum</i> / U6436b  | JN655771 |
| <i>E. macellum</i> / U6436c  | JN655772 |

---
